# Supplementary material for: A novel Cd-MOF with enhanced thermo-sensitivity: the rational design, synthesis and multipurpose applications
Source: Royal Society of Chemistry journal article supplement (doi:10.1039/d1qi00198a), 2021-01-01
Supplement: d1qi00198a1.pdf [file d1qi00198a1.pdf]

## Supporting Information

### **A novel Cd-MOF with enhanced thermo-sensitivity: The rational design, synthesis and multipurpose applications**

**Ping Ju,<sup>a</sup> Mengting Li,<sup>a</sup> Hua Yang,<sup>b</sup> Long Jiang,<sup>c</sup> Lian Xia,<sup>a</sup> Rongmei Kong,<sup>a</sup> Ensheng Zhang,<sup>\*a</sup> Fengli Qu<sup>\*a</sup>**

<sup>a</sup> College of Chemistry and Chemical Engineering, Qufu Normal University, Qufu, Shandong, 273165, P. R. China.

<sup>b</sup> Laboratory of New Energy & New Functional Materials, College of Chemistry and Chemical Engineering, Yan'an University, Yan'an, Shaanxi, 716000, P. R. China.

<sup>c</sup> Instrumental Analysis & Research Center, Sun Yat-Sen University, Guangzhou 510275, PR China

E-mail address: sdzes2006@163.com; fengliqun@hotmail.com

**Table S1** Lanthanide metal ions based LMOF thermometers

| LMOF thermometers                                                                                                          | Metal center                          | Detection ranges (K) | Reference |
|----------------------------------------------------------------------------------------------------------------------------|---------------------------------------|----------------------|-----------|
| Eu <sub>0.0069</sub> Tb <sub>0.9931</sub> -DMBDC                                                                           | Eu <sup>3+</sup> and Tb <sup>3+</sup> | 50-200               | 1         |
| Tb <sub>0.9</sub> Eu <sub>0.1</sub> PIA                                                                                    | Eu <sup>3+</sup> and Tb <sup>3+</sup> | 100-300              | 2         |
| Tb <sub>0.957</sub> Eu <sub>0.043</sub> cpda                                                                               | Eu <sup>3+</sup> and Tb <sup>3+</sup> | 40-300               | 3         |
| Tb <sub>0.98</sub> Eu <sub>0.02</sub> (OA) <sub>0.5</sub> (DSTP)·3H <sub>2</sub> O                                         | Eu <sup>3+</sup> and Tb <sup>3+</sup> | 77–275               | 4         |
| {[Eu <sub>2</sub> (L) <sub>3</sub> ·(H <sub>2</sub> O) <sub>2</sub> ·(DMF) <sub>2</sub> ]·16H <sub>2</sub> O} <sub>n</sub> | Eu <sup>3+</sup>                      | 10–150               | 5         |
| Tb <sub>0.95</sub> Eu <sub>0.05</sub> FTPTC                                                                                | Eu <sup>3+</sup> and Tb <sup>3+</sup> | 25–300               | 6         |
| Tb <sub>0.80</sub> Eu <sub>0.20</sub> BPDA                                                                                 | Eu <sup>3+</sup> and Tb <sup>3+</sup> | 298-318              | 7         |
| ZJU-88⇨perylene                                                                                                            | Eu <sup>3+</sup>                      | 293-353              | 8         |

**Table S2.** Selected Bond Lengths (Å) and Bond Angles (°)

| Bond            | Dist.     | Bond            | Dist.     | Bond            | Dist.    |
|-----------------|-----------|-----------------|-----------|-----------------|----------|
| Cd(1)-O(1)      | 2.507(2)  | Cd(1)-N(1)      | 2.430(2)  | Cd(1)-O(4W)     | 2.213(2) |
| Cd(1)-O(5)      | 2.518(2)  | Cd(1)-O(6)      | 2.268(2)  | Cd(1)-O(3)      | 2.293(2) |
| Cd(1)-O(2)      | 2.537(2)  | Cd(2)-O(1W)     | 2.201(2)  | Cd(2)-O(1W)     | 2.344(3) |
| Cd(2)-O(4)      | 2.510(2)  | Cd(2)-O(3)      | 2.326(2)  | Cd(2)-O(3W)     | 2.530(3) |
| Cd(2)-O(2)      | 2.312(2)  | Cd(2)-O(2W)     | 2.368(2)  | Cd(2)-N(2)      | 2.343(3) |
| Angle           | (°)       | Angle           | (°)       | Angle           | (°)      |
| N(1)-Cd(1)-O(1) | 141.44(8) | O(1)-Cd(1)-O(2) | 51.14(7)  | O(1)-Cd(1)-O(5) | 71.80(7) |
| O(3)-Cd(1)-O(2) | 69.69(7)  | O(3)-Cd(1)-O(5) | 141.11(7) | O(3)-Cd(1)-N(1) | 97.91(8) |
| O(3)-Cd(1)-O(1) | 120.60(7) | O(6)-Cd(1)-O(2) | 90.01(8)  | O(6)-Cd(1)-O(3) | 87.76(8) |

|                   |            |                  |            |                   |            |
|-------------------|------------|------------------|------------|-------------------|------------|
| O(6)-Cd(1)-O(5)   | 54.51(7)   | O(6)-Cd(1)-N(1)  | 96.53(8)   | O(6)-Cd(1)-O(1)   | 87.50(8)   |
| O(5)-Cd(1)-O(2)   | 114.37(7)  | O(4w)-Cd(1)-O(2) | 89.99(9)   | O(4w)-Cd(1)-O(3)  | 102.95(10) |
| O(4w)-Cd(1)-O(6)  | 168.56(10) | O(4w)-Cd(1)-O(5) | 115.45(10) | O(4w)-Cd(1)-N(1)  | 86.07(9)   |
| O(4w)-Cd(1)-O(1)  | 83.61(9)   | N(1)-Cd(1)-O(2)  | 165.81(8)  | N(1)-Cd(1)-O(5)   | 79.59(4)   |
| O(2w)-Cd(2)-O(3w) | 77.76(10)  | O(2w)-Cd(2)-O(4) | 163.70(8)  | O(2)-Cd(2)-O(2w)  | 80.60(8)   |
| O(2)-Cd(2)-O(3w)  | 102.57(9)  | O(2)-Cd(2)-O(3)  | 73.25(7)   | O(2)-Cd(2)-O(4)   | 115.54(8)  |
| O(2)-Cd(2)-N(2)   | 84.88(8)   | O(3)-Cd(2)-O(2w) | 135.41(8)  | O(3)-Cd(2)-O(3w)  | 73.64(9)   |
| O(3)-Cd(2)-O(4)   | 53.77(7)   | O(3)-Cd(2)-N(2)  | 104.05(8)  | O(4)-Cd(2)-O(3w)  | 95.54(10)  |
| N(2)-Cd(2)-O(2w)  | 108.91(8)  | N(2)-Cd(2)-O(3w) | 170.91(10) | N(2)-Cd(2)-O(4)   | 76.37(8)   |
| O(1w)-Cd(2)-O(2w) | 82.00(9)   | O(1w)-Cd(2)-O(2) | 161.62(8)  | O(1w)-Cd(2)-O(3w) | 79.39(10)  |
| O(1w)-Cd(2)-O(3)  | 124.16(8)  | O(1w)-Cd(2)-O(4) | 82.16(8)   | O(1w)-Cd(2)-N(2)  | 95.23(10)  |

Symmetry codes: #1 1-x, -1-y, -z; #2 +x, -1-y, 1/2+z; #3 1-x, -y, -z; #4 +x, -1-y, -1/2+z; #5 1/2-x, -1/2-y, -z .

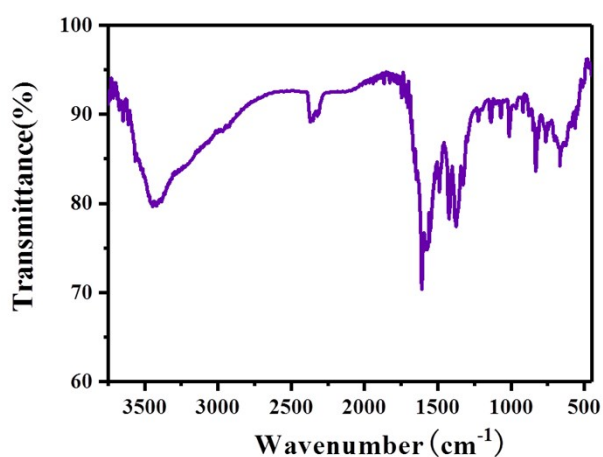

Fig. S1 FT-IR spectrum of complex 1

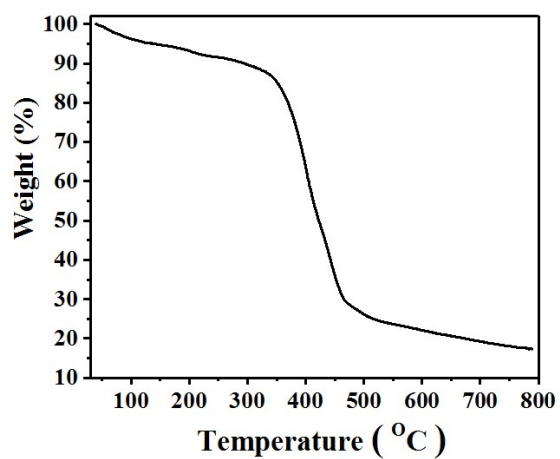

**Fig. S2** TG curve for complex 1.

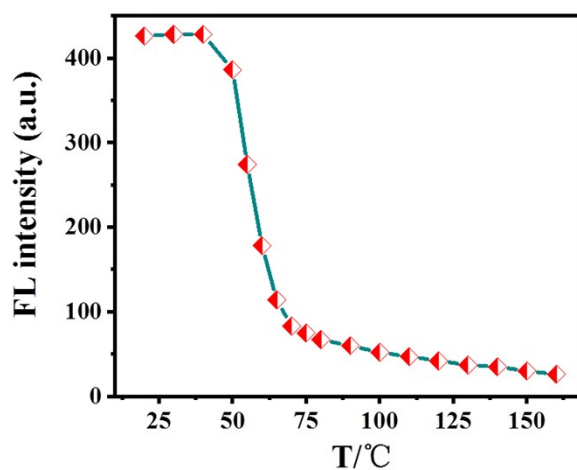

**Fig. S3** Fluorescent intensity of complex 1 with gradually change temperature from 160 °C to 20 °C ( $\lambda_{\text{ex}} = 300 \text{ nm}$ , slits: 2.5 nm/5 nm).

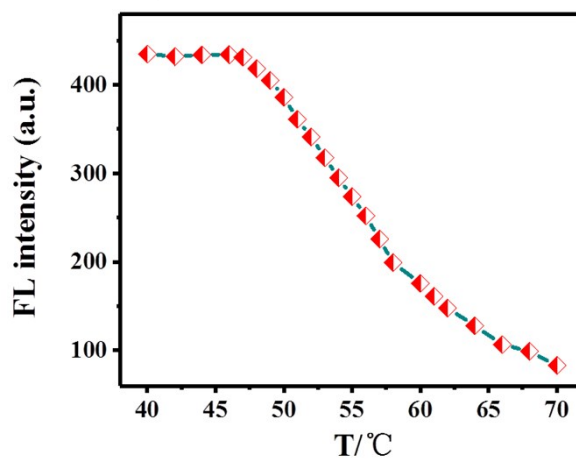

**Fig. S4** Fluorescent intensity of complex 1 with gradually change temperature from 70 °C to 40 °C ( $\lambda_{\text{ex}} = 300 \text{ nm}$ , slits: 2.5 nm/5 nm).

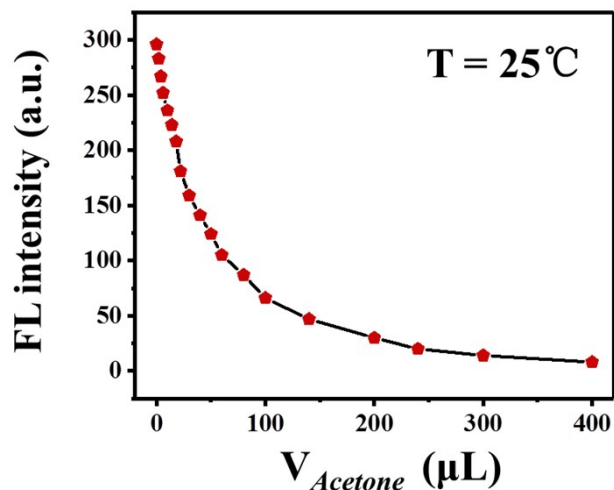

**Fig. S5** Fluorescent intensity of complex **1**-H<sub>2</sub>O suspension after the addition of acetone ( $\lambda_{\text{ex}} = 300 \text{ nm}$ ,  $\lambda_{\text{em}} = 410 \text{ nm}$ , slits: 5 nm/10 nm, all the tests were carried out at 25°C).

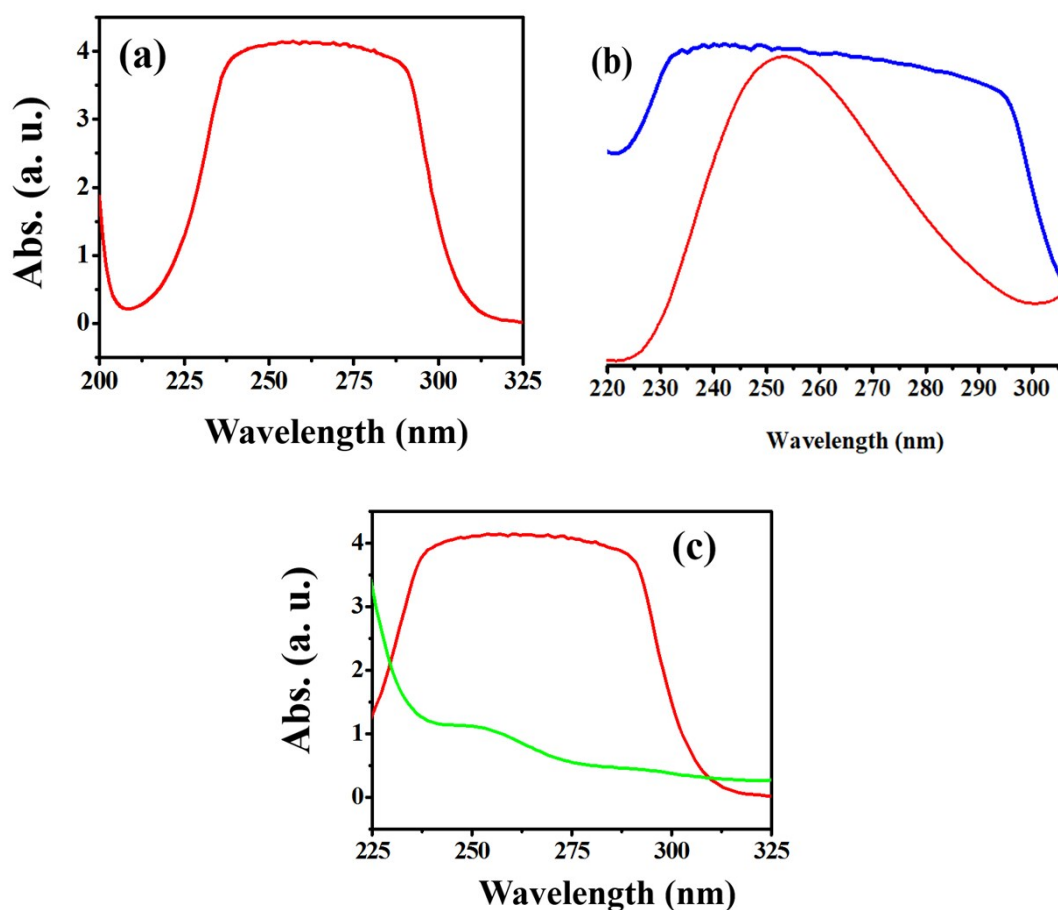

**Fig. S6** (a) The UV-vis spectrum of acetone in water; (b) Overlap of absorption spectrum of acetone (the blue line) and fluorescent excitation spectrum of complex **1** (the red line) ; (c) Overlap of absorption spectra of acetone (the red line) and complex **1** (the green line).

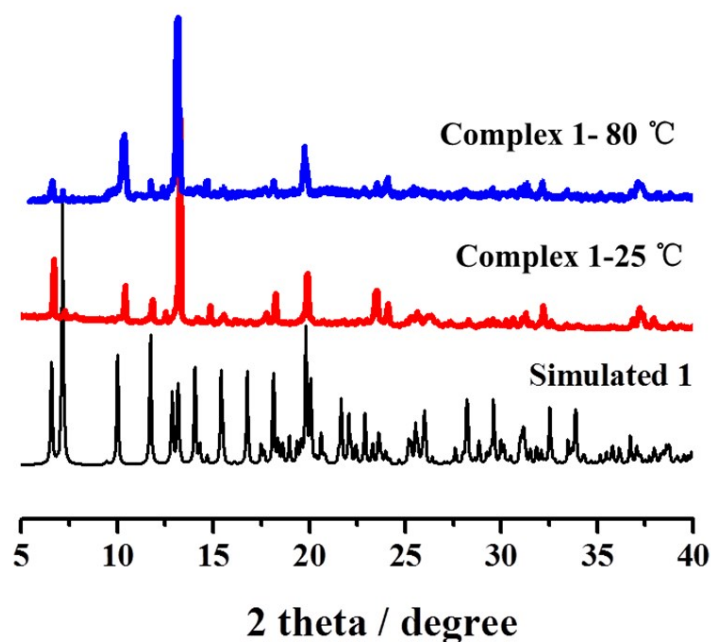

**Fig. S7** PXR D patterns of complex 1 at 25 °C and 80 °C.

#### References:

- [1] Y. Cui, H. Xu, Y. Yue, Z. Guo, J. Yu, Z. Chen, J. Gao, Y. Yang, G. Qian, B. Chen, A luminescent mixed-lanthanide Metal-organic framework thermometer, *J. Am. Chem. Soc.*, 2012, **134**, 3979-3982.
- [2] X. T. Rao, T. Song, J. K. Gao, Y. J. Cui, Y. Yang, C. D. Wu, B. L. Chen, G. D. Qian, A highly sensitive mixed lanthanide metal-organic framework self-calibrated luminescent thermometer, *J. Am. Chem. Soc.*, 2013, **135**, 15559-15564.
- [3] Y. Cui, W. Zou, R. Song, J. Yu, W. Zhang, Y. Yang, G. Qian, A ratiometric and colorimetric luminescent thermometer over a wide temperature range based on a lanthanide coordination polymer, *Chem. Commun.*, 2014, **50**, 719-721.
- [4] Y. Wei, R. Sa, Q. Li, K. Wu, Highly stable and sensitive Ln MOF ratiometric thermometers constructed with mixed ligands, *Dalton Trans.*, 2015, **44**, 3067-3074.
- [5] D. Wang, Q. Tan, J. Liu, Z. Liu, A stable europium metal-organic framework as a dual-functional luminescent sensor for quantitatively detecting temperature and humidity, *Dalton Trans.*, 2016, 45, 18450-18454.
- [6] D. Zhao, D. Yue, L. Zhang, K. Jiang, G. Qian, Cryogenic luminescent Tb/Eu-MOF thermometer based on a fluorine-modified tetracarboxylate ligand, *Inorg. Chem.*, 2018, **57**, 12596-12602.
- [7] D. Zhao, X. Rao, J. Yu, Y. Cui, Y. Yang, G. Qian, Design and synthesis of an MOF thermometer with high sensitivity in the physiological temperature range, *Inorg. Chem.*, 2015, **54**, 11193-11199.
- [8] Y. Cui, R. Song, J. Yu, M. Liu, Z. Wang, C. Wu, Y. Yang, Z. Wang, B. Chen, G. Qian, Dual-emitting MOF=Dye composite for ratiometric temperature sensing, *Adv. Mater.*, 2015, **27**, 1420-1425.
